# Supplementary material for: Distinguishing Between Isobaric Ions Using Microdroplet Hydrogen-Deuterium Exchange Mass Spectrometry
Source: Preprints.org preprint supplement (doi:10.20944/preprints202110.0035.v1), 2021-10-04
Supplement: Supplementary file 3 [file supplementary]

**SUPPORTING INFORMATION**

**Distinguishing Between Isobaric Ions Using Microdroplet Hydrogen-Deuterium Exchange Mass Spectrometry**

Xiaowei Song1,2, Jia Li2, Mohammad Mofidfar1, Richard N. Zare1*

1. Department of Chemistry, Stanford University, Stanford, CA, USA. 94305
2. Department of Chemistry, Fudan University, Shanghai, China. 200438

**Correspondence**

Richard N. Zare: [rnz@stanford.edu](mailto:rnz@stanford.edu)

**Table of Contents**

| **Figure/Table** | **Legend** | **Pages** |
| --- | --- | --- |
| Figure S1 | CID-MS/MS spectra of codeine, and hydrocodone. | S2 |
| Figure S2 | CID-MS/MS spectra of 6-acetyl morphine, and naloxona. | S3 |
| Figure S3 | CID-MS/MS spectra of morphine, and norcodeine. | S4 |
| Table S1 | List of isobaric ions that were frequently detected in saliva or serum and successfully distinguished by HDX-CPSI-MS. | S5 |
| Table S2 | List of isobaric ions that were frequently detected in biological fluids and successfully distinguished by HDX-CPSI-MS. | S6 |


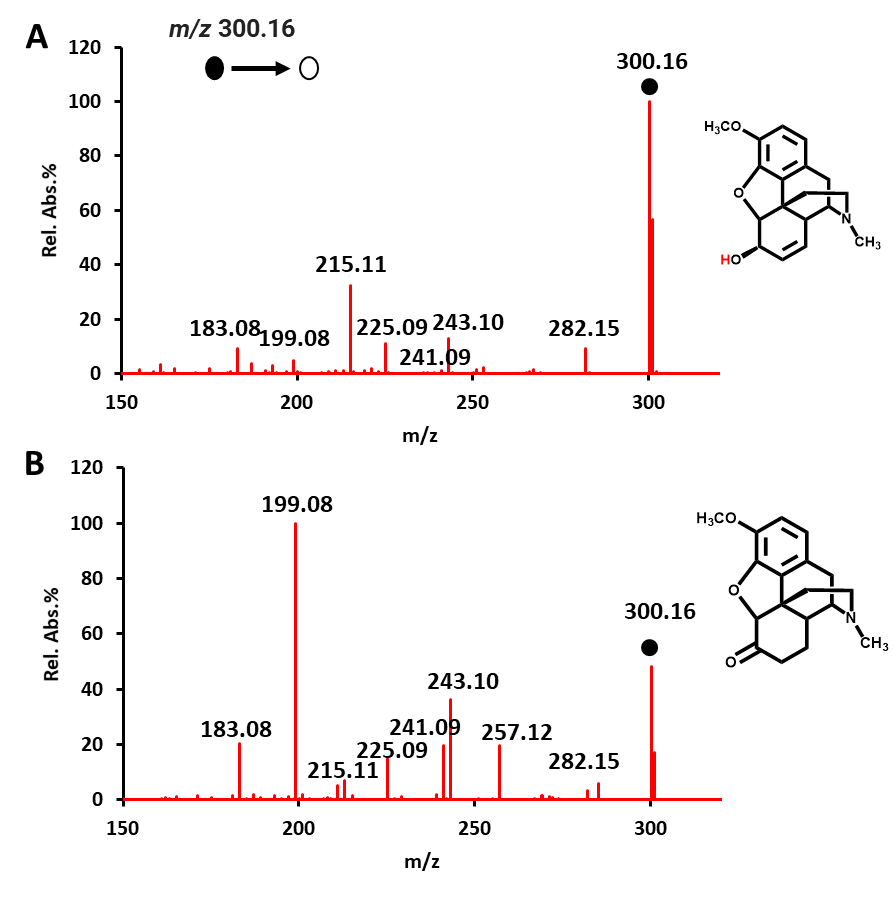


**Figure S1.** **CID-MS/MS spectra of (A) codeine and (B) hydrocodone. The black dot indicates the precursor ion.**

**
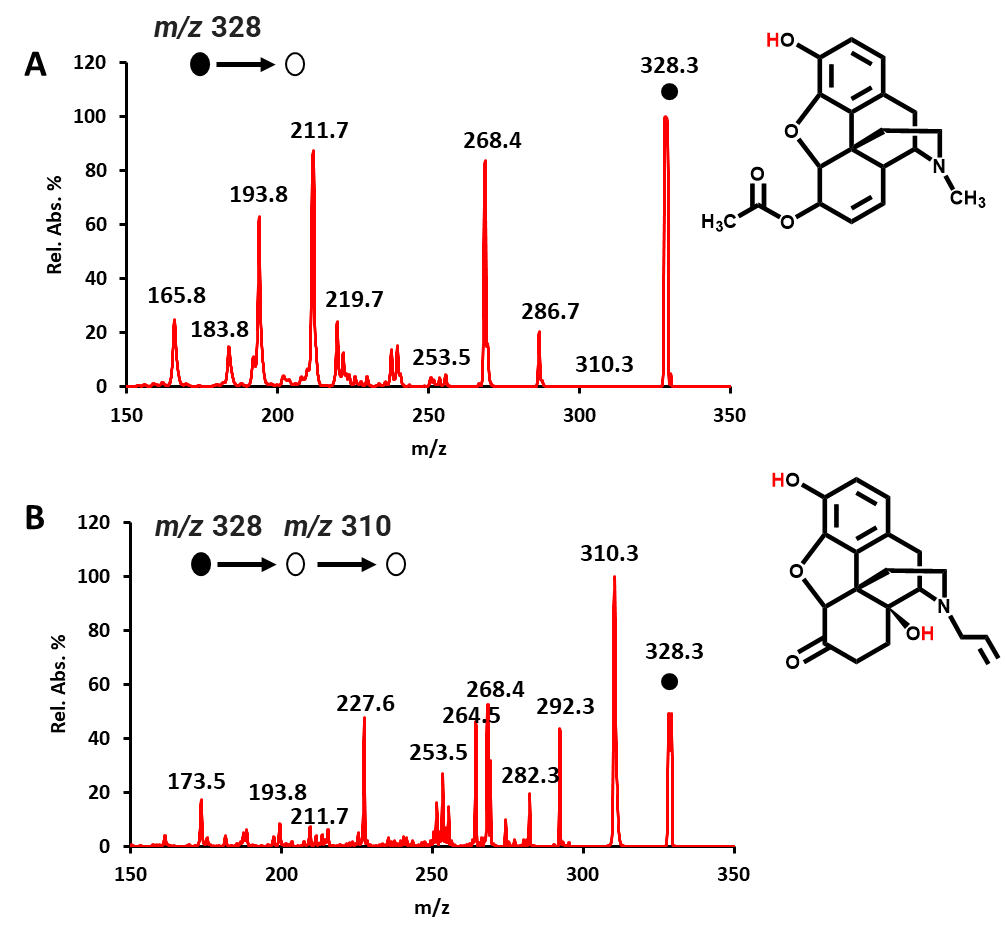
**

**Figure S2. CID-MS/MS spectra of (A) 6-acetyl morphine and (B) naloxone. The black dot indicates the precursor ion.**

**
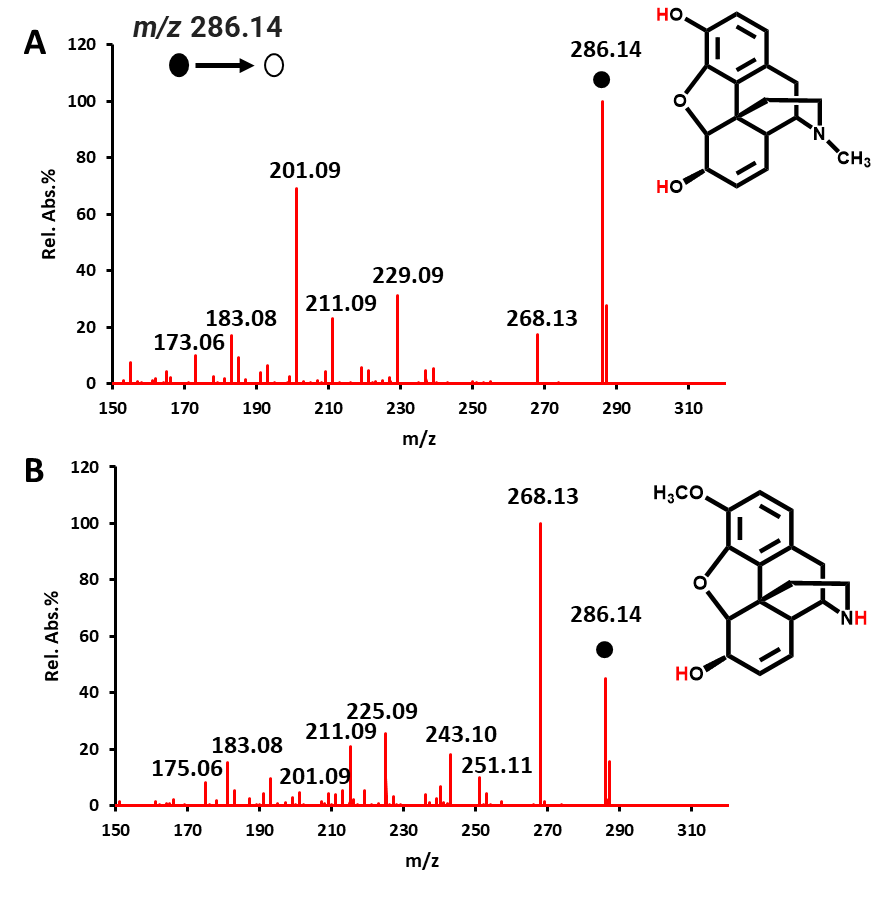
**

**Figure S3. CID-MS/MS spectra of (A) morphine and (B) norcodeine. The black dot indicates the precursor ion.**

**Table S1. Isobaric ions that were frequently detected in saliva or serum and successfully distinguished by HDX-CPSI-MS.**

| **No** | **Exact *m/z*** | **Adduct Ions** | **Formulae** | **Metabolites** | **Number of Exchangeable**  **proton sites** | **Base**  **peaks** |
| --- | --- | --- | --- | --- | --- | --- |
| 1 | 118.0862 | [M+H]+ | C5H11NO2 | Betaine | 1 | D0 |
| 5-Aminopentanoic acid | 3 | D1 |
| Valine | 3 | D0 |
| 2 | 141.0789 | [M+K]+ | C5H14N2 | Cadaverine | 4 | D2 |
| N-methyl putrescine | 3 | D2 |
| 3 | 146.0459 | [M-H]- | C5H9NO4 | Glutamate | 3 | D2 |
| O-acetyl serine | 2 | D0 |
| N-acetyl serine | 2 | D1 |
| 4 | 280.0904 | [M+Na]+ | C10H15N3O5 | 5-Methylcytidine | 5 | D2 |
| 3-methylcytidine | 4 | D2 |
| 280.0920 | [M+H]+ | C8H20NO6P | glycerophosphocholine | 3 | D2 |
| 5 | 112.0369 | [M+Na]+ | C3H7NO2 | Alanine | 3 | D1 |
| Sarcosine | 2 | D1 |
| 6 | 126.0520 | [M+Na]+ | C4H9NO2 | aminobutyric acid | 3 | D1 |
| N, N-dimethylglycine | 1 | D0 |
| 7 | 137.0706 | [M+H]+ | C7H8N2O | 2-aminobenzamide | 4 | D1 |
| N-methylnicotinamide | 1 | D0 |

**Table S2. The relative intensities in HDX patterns acquired from samples of glucose (G) and inositol (I) at different molar ratios.**

| ***m/z*** | **G:I Simulated HDX Patterns** | | | **G:I Observed HDX Patterns** | | |
| --- | --- | --- | --- | --- | --- | --- |
| 1:1 | 3:1 | 1:3 | 1:1 | 3:1 | 1:3 |
| 203.05 | 46 | 55 | 33 | 41 | 55 | 38 |
| 204.06 | 73 | 82 | 57 | 72 | 78 | 63 |
| 205.07 | 100 | 100 | 91 | 100 | 100 | 95 |
| 206.08 | 95 | 83 | 100 | 87 | 91 | 100 |
| 207.09 | 64 | 49 | 74 | 52 | 51 | 79 |
| 208.10 | 28 | 19 | 35 | 17 | 18 | 40 |
| 209.11 | 4 | 2 | 6 | 5 | 6 | 7 |
